# Supplementary material for: In situ growth of S-incorporated CoNiFe(oxy)hydroxide nanoarrays as efficient multifunctional electrocatalysts
Source: Royal Society of Chemistry journal article supplement (doi:10.1039/d2qi00583b), 2022-01-01
Supplement: d2qi00583b1.pdf [file d2qi00583b1.pdf]

## **Supporting Information**

In Situ Growth of S-Incorporated CoNiFe(oxy)hydroxides

Nanoarrays as Efficient Multifunctional Electrocatalysts

Caihong Fang\*, Deliang Zhang, Xin Wang, Ran Li

College of Chemistry and Materials Science, Center for Nano Science and Technology,

Key Laboratory of Electrochemical Clean Energy of Anhui Higher Education

Institutes, Anhui Normal University, Wuhu, 241000, China

AUTHOR INFORMATION

**Corresponding Author**

\*E-mail: [chfang@mail.ahnu.ed.cn](mailto:chfang@mail.ahnu.ed.cn);

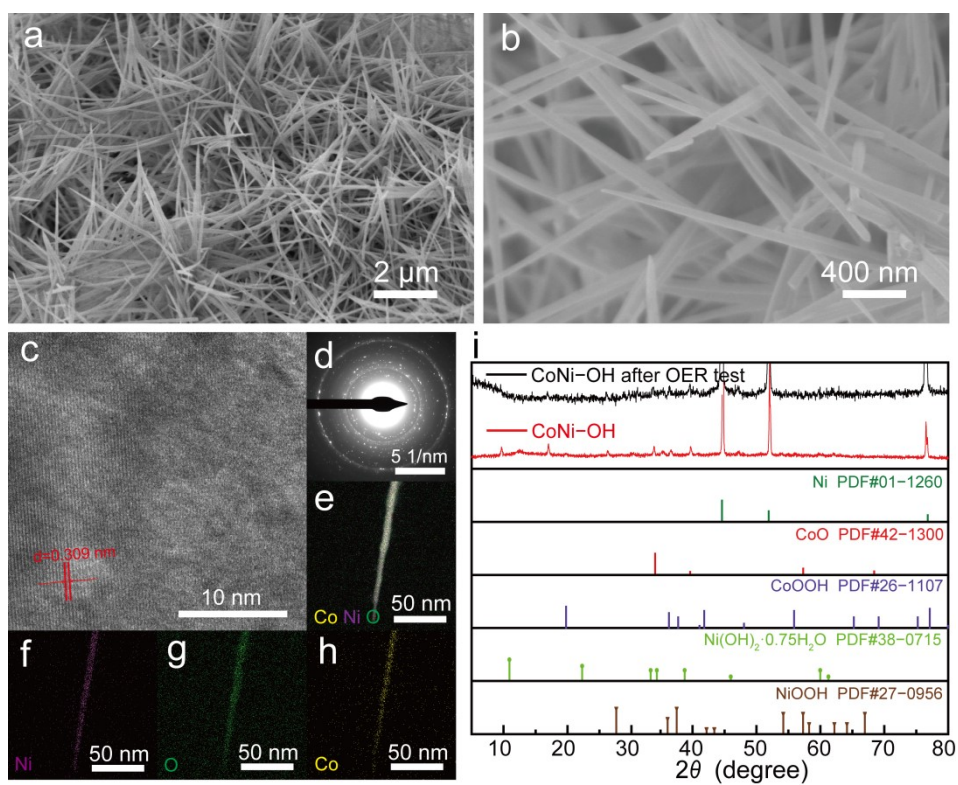

Fig. S1. (a,b) SEM images at different magnifications, (c) HRTEM image,(d) SAED patterns, (e–h) elemental mappings, (i) XRD patterns of the of CoNi–OH nanostructures.

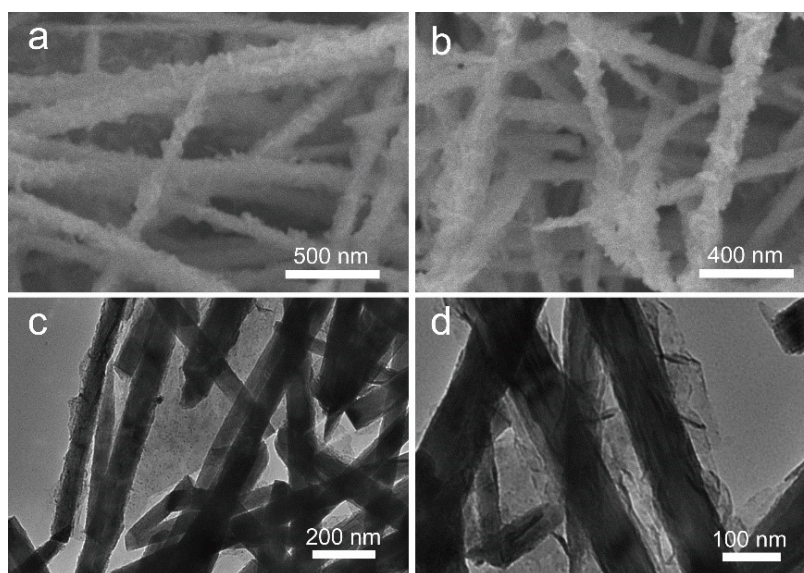

Fig. S2 (a–b) SEM and (c–d) TEM images of CoNiFeS–OH at different magnifications.

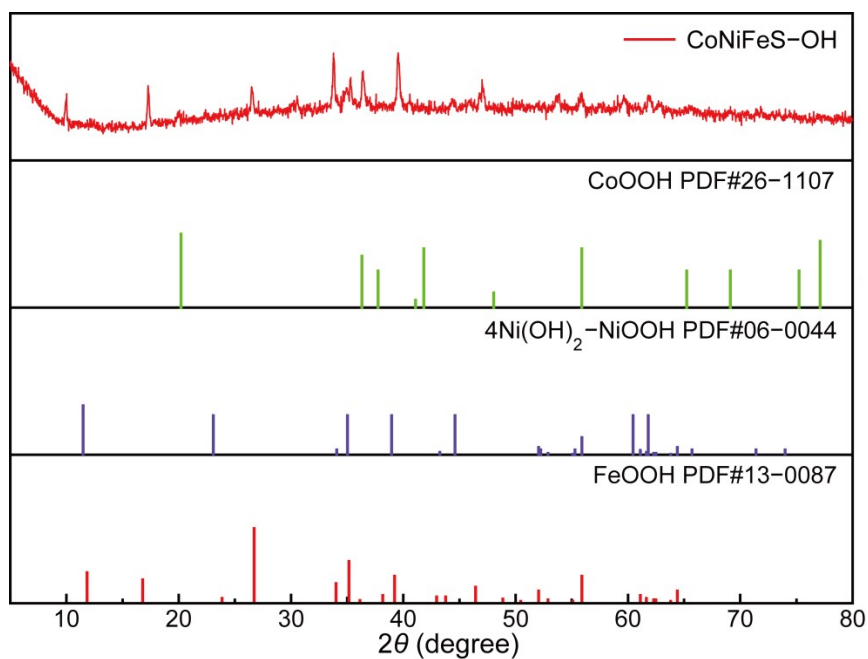

Fig. S3 XRD patterns of CoNiFeS-OH.

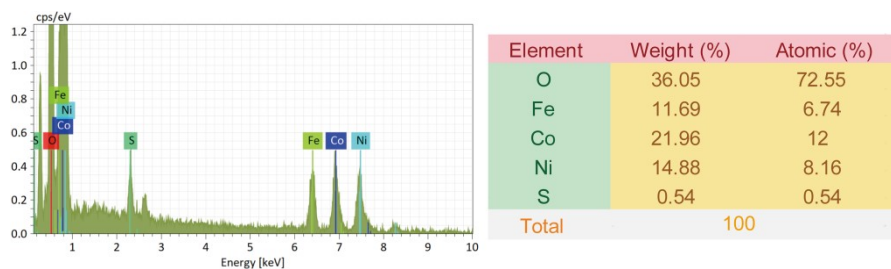

Fig. S4 EDS spectra and the corresponding elemental compositions of CoNiFeS-OH.

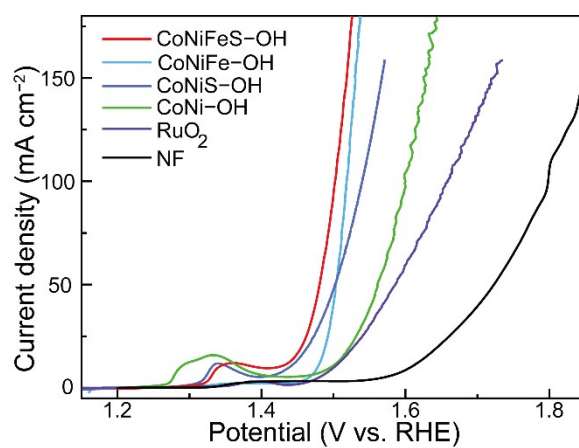

Fig. S5 LSV curves for the OER of CoNiFeS-OH, CoNi-OH, CoNiFe-OH, CoNiS-OH, RuO<sub>2</sub>, and NF in 1.0 M KOH at a scan rate of 0.5 mV s<sup>-1</sup>.

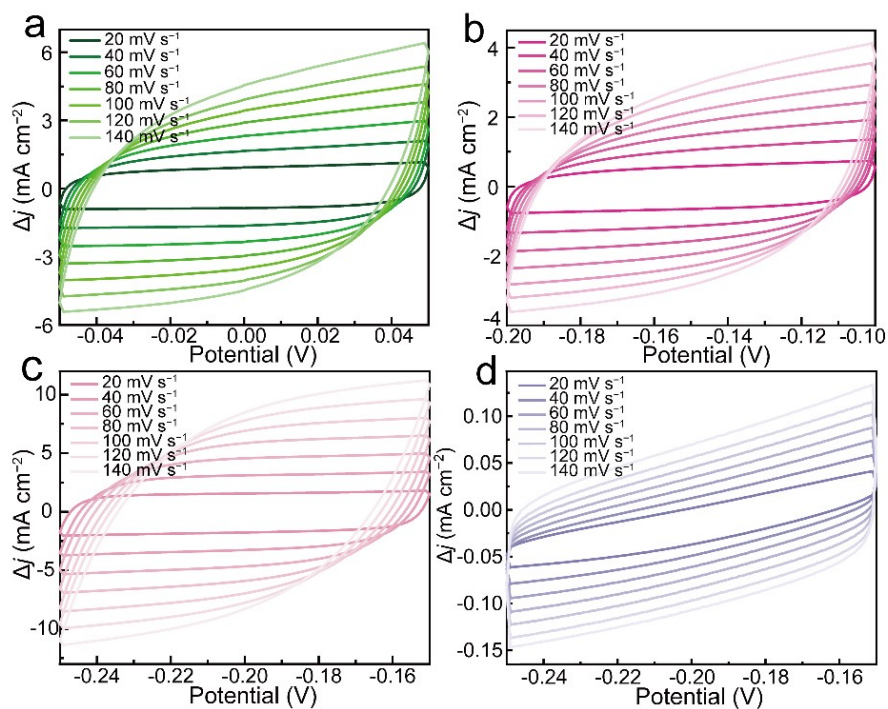

Fig. S6 CV curves for OER measured in KOH (1.0 M) at various scan rates of 20, 40, 60, 80, 100, 120 and 140  $\text{mV s}^{-1}$ : (a) CoNiFeS-OH, (b) CoNi-OH, (c) RuO<sub>2</sub>, and (d) NF, respectively.

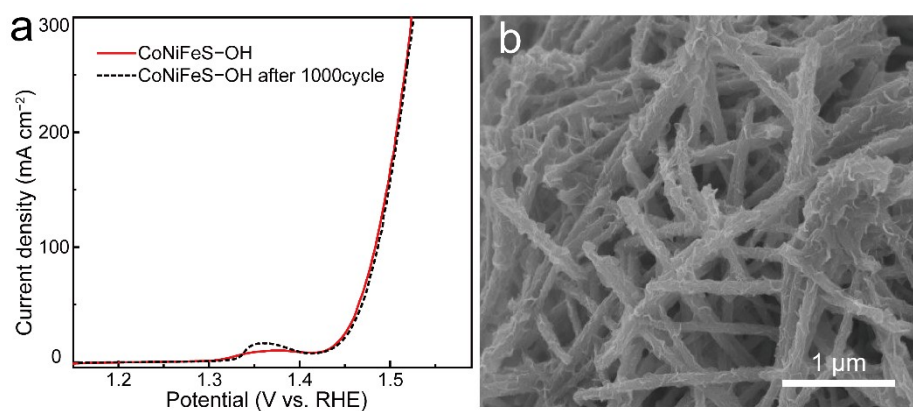

Fig. S7 (a) The polarization curve LSV for OER before and after 1000 CV test of CoNiFeS-OH. (b) SEM of CoNiFeS-OH after 1000 CV in 1M KOH (1.0 M).

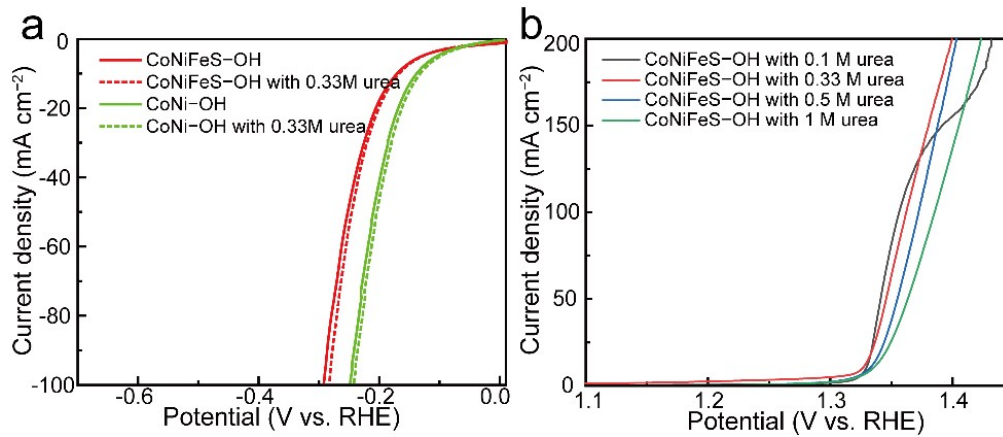

Fig. S8 (a) LSV curves for the HER of CoNiFeS-OH and CoNi-OH in KOH (1.0 M) and in KOH (1.0 M) with urea (0.33 M) at a scan rate of  $5 \text{ mV s}^{-1}$ . (b) LSV curves for the UOR of CoNiFeS-OH in different urea concentrations at a scan rate of  $1 \text{ mV s}^{-1}$ .

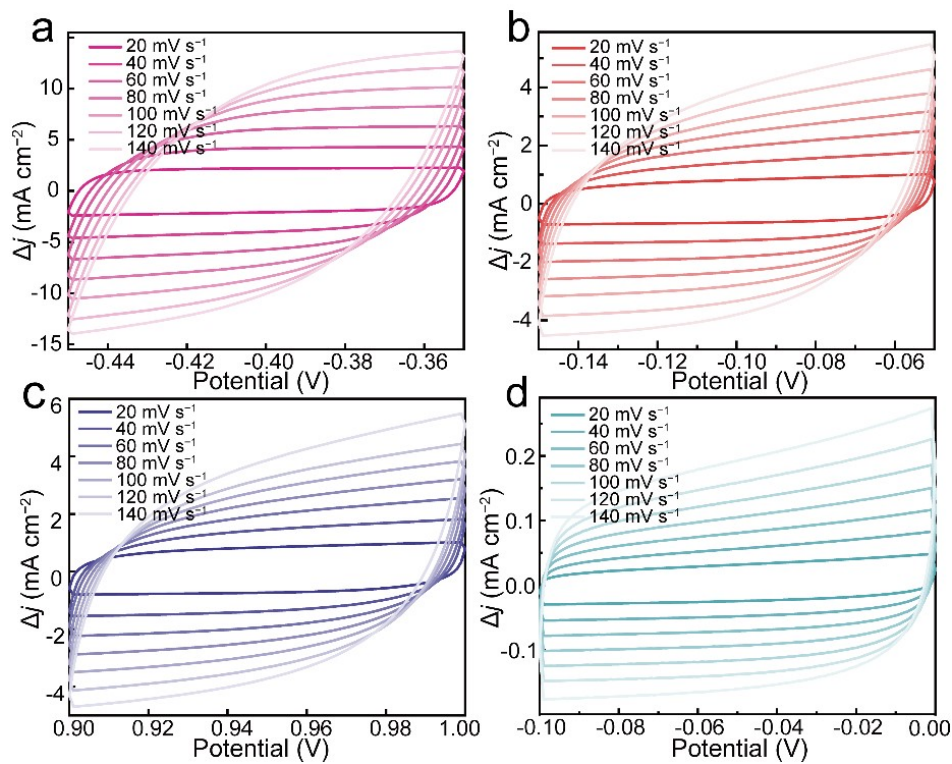

Fig. S9 CV curves for UOR in KOH (1.0 M) with urea (0.33 M) at scan rate of 20, 40, 60, 80, 100, 120 and  $140 \text{ mV s}^{-1}$ : (a) CoNiFeS-OH, (b) CoNi-OH, (c) RuO<sub>2</sub>, (d) NF.



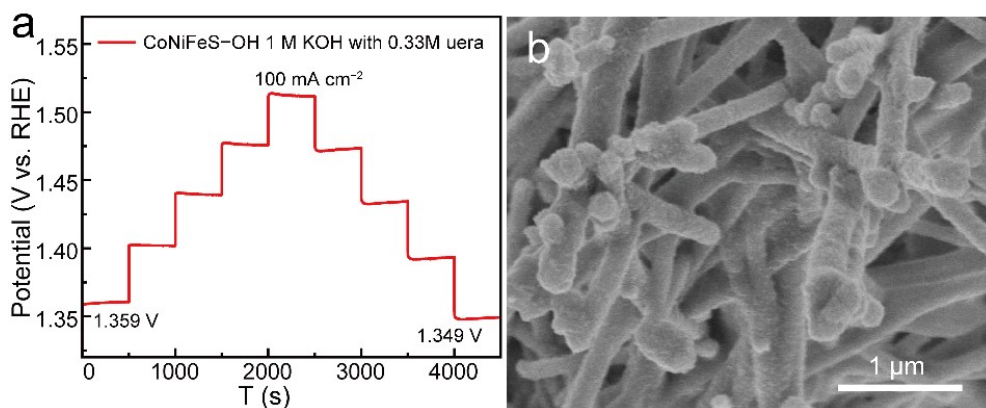

Fig. S10 (a) Multi-step chronopotentiometric curve of CoNiFeS-OH from 20 to 100  $\text{mA cm}^{-2}$  in KOH (1.0 M) with urea (0.33 M). (b) SEM of CoNiFeS-OH after 1000 CV in KOH (1.0 M) with urea (0.33 M).

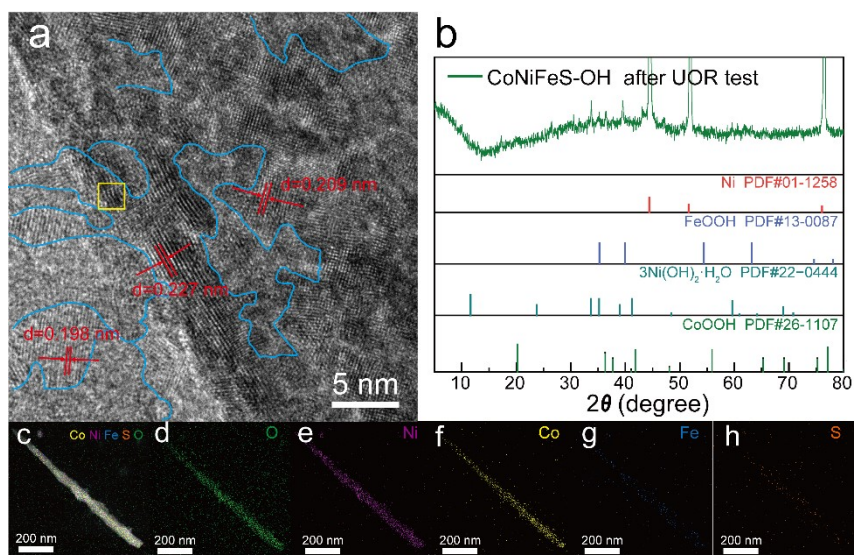

Fig. S11 Characterizations of CoNiFeS-OH catalysts after UOR stability test. (a,b) HRTEM image and XRD patterns, (c-h) elemental mapping of immersed, O, Ni, Co, Fe, and S, respectively.

Table S1 Overpotential of CoNiFeS–OH, CoNi–OH, RuO<sub>2</sub>, and NF toward OER at  $\eta_{10}$ ,  $\eta_{20}$ ,  $\eta_{50}$ , and  $\eta_{100}$  in KOH (1.0 M).

|                  | 10 mA<br>cm <sup>-2</sup> (mV) | 20 mA<br>cm <sup>-2</sup> (mV) | 50 mA<br>cm <sup>-2</sup> (mV) | 100 mA cm <sup>-2</sup><br>(mV) |
|------------------|--------------------------------|--------------------------------|--------------------------------|---------------------------------|
| CoNiFeS–OH       | 192                            | 226                            | 251                            | 272                             |
| CoNi–OH          | 260                            | 290                            | 330                            | 370                             |
| RuO <sub>2</sub> | 271                            | 298                            | 355                            | 428                             |
| NF               | 377                            | 415                            | 493                            | 568                             |

Table S2 Comparison for OER properties of CoNiFeS–OH with other non-noble metal based electrocatalysts in KOH (1.0 M).

| Catalysts                                           | Substrate     | Electrolyte<br>Conc.<br>(KOH) | Current<br>density<br>(mA cm <sup>-2</sup> ) | Overpotenti-<br>al (mV) | Ref.         |
|-----------------------------------------------------|---------------|-------------------------------|----------------------------------------------|-------------------------|--------------|
| Fe–CoNi–OH                                          | Nickel foam   | 1M                            | 10                                           | 210                     | 1            |
| NiFeCr LDH                                          | Nickel foam   | 1M                            | 10                                           | 225                     | 2            |
| Fe–MOFs@Ni-<br>MOFs@NiFe–LDH                        | Nickel foam   | 1M                            | 10                                           | 275                     | 3            |
| Fe–Co– $\alpha$ MOF                                 | Nickel foam   | 1M                            | 10                                           | 249                     | 4            |
| CoFeV LDH                                           | Nickel foam   | 1M                            | 10                                           | 242                     | 5            |
| Fe–Ni(OH) <sub>2</sub>                              | Nickel foam   | 1M                            | 10                                           | 235                     | 6            |
| NiCo <sub>2</sub> S <sub>4</sub> /FeOOH             | Nickel foam   | 1M                            | 10                                           | ~200                    | 7            |
| NiCo–LDH@FeOOH                                      | Carbon papers | 1M                            | 10                                           | 224                     | 8            |
| NiFePS                                              | Nickel foam   | 1M                            | 10                                           | 242                     | 9            |
| FeCoNiPB/<br>(FeCoNi) <sub>3</sub> O <sub>4-x</sub> | copper foil   | 1M                            | 10                                           | 229                     | 10           |
| CoNiFeS–OH                                          | Nickel foam   | 1M                            | 10                                           | 192                     | This<br>work |

Table S3 Potential of CoNiFeS–OH, CoNi–OH, RuO<sub>2</sub>, and NF toward UOR at  $\eta_{10}$ ,  $\eta_{20}$ ,  $\eta_{50}$ , and  $\eta_{100}$  in KOH (1.0 M) with urea (0.33 M).

|                  | 10 mA<br>cm <sup>-2</sup> (V) | 20 mA<br>cm <sup>-2</sup> (V) | 50 mA<br>cm <sup>-2</sup> (V) | 100 mA<br>cm <sup>-2</sup> (V) |
|------------------|-------------------------------|-------------------------------|-------------------------------|--------------------------------|
| CoNiFeS–OH       | 1.329                         | 1.338                         | 1.354                         | 1.373                          |
| CoNi–OH          | 1.316                         | 1.333                         | 1.366                         | 1.425                          |
| RuO <sub>2</sub> | 1.388                         | 1.423                         | 1.549                         | 1.645                          |
| NF               | 1.360                         | 1.390                         | /                             | /                              |

Table S4 Comparison for UOR properties of CoNiFeS–OH with other non-noble metal based electrocatalysts in KOH (1.0 M) with urea.

| Catalysts                                        | substrate    | Urea<br>concentration (M) | Current<br>density<br>(mA cm <sup>-2</sup> ) | Voltage (V<br>vs RHE) | Ref.      |
|--------------------------------------------------|--------------|---------------------------|----------------------------------------------|-----------------------|-----------|
| MoS <sub>2</sub> /Ni <sub>3</sub> S <sub>2</sub> | Nickel foam  | 0.33                      | 20                                           | 1.45                  | 11        |
| NiMo alloy                                       | Nickel foam  | 0.1                       | 10                                           | 1.48                  | 12        |
| NiCo <sub>2</sub> S <sub>4</sub>                 | Carbon cloth | 0.33                      | 10                                           | 1.45                  | 13        |
| NiMoS                                            | Carbon cloth | 0.5                       | 10                                           | 1.59                  | 14        |
| NiCo <sub>2</sub> S <sub>4</sub>                 | Carbon cloth | 0.33                      | 10                                           | 1.45                  | 15        |
| NiCo LDH                                         | Nickel foam  | 0.33                      | 10                                           | 1.353                 | 16        |
| FeNi <sub>3</sub> –MoO <sub>2</sub>              | Nickel foam  | 0.5                       | 10                                           | 1.29                  | 17        |
| Ni@C–250                                         | CP           | 0.5                       | 10                                           | 1.35                  | 18        |
| V–Ni <sub>3</sub> N/NF                           | Nickel foam  | 0.5                       | 10                                           | 1.361                 | 19        |
| NiS/MoS <sub>2</sub>                             | Carbon cloth | 0.4                       | 100                                          | 1.43                  | 20        |
| CoNiFeS–OH                                       | Nickel foam  | 0.33                      | 10                                           | 1.329                 | This work |



Table S5 Comparison for urea electrolysis efficiency of CoNiFeS–OH//CoNiFeS–OH with other non-noble metal based electrocatalysts in KOH (1.0 M) with urea.

| Catalysts                                                                | Urea concentration (M) | $j$ (mA cm <sup>-2</sup> ) | Cell voltage (V) | Ref.      |
|--------------------------------------------------------------------------|------------------------|----------------------------|------------------|-----------|
| NiFeCo LDH/NF                                                            | 0.33                   | 10                         | 1.49             | 21        |
| NiCo <sub>2</sub> S <sub>4</sub> NS/CC                                   | 0.5                    | 10                         | 1.49             | 13        |
| Ni <sub>3</sub> S <sub>2</sub> -NiS/NF                                   | 0.5                    | 50                         | 1.54             | 22        |
| NC-FNCP                                                                  | 0.5                    | 10                         | 1.52             | 23        |
| Ni–Co <sub>9</sub> S <sub>8</sub> /CC                                    | 0.33                   | 10                         | 1.52             | 24        |
| NiMoS/CC                                                                 | 0.5                    | 10                         | 1.59             | 14        |
| NiCo <sub>2</sub> S <sub>4</sub> /CC                                     | 0.33                   | 10                         | 1.45             | 15        |
| P–NiCoZn LDH/NF                                                          | 0.5                    | 10                         | 1.479            | 25        |
| NF/PPy700Ni <sub>3</sub> S <sub>2</sub> –8–Ar                            | 0.33                   | 10                         | 1.47             | 26        |
| (Ni <sub>0.25</sub> Fe <sub>0.75</sub> ) <sub>3</sub> S <sub>2</sub> /NF | 0.33                   | 10                         | 1.49             | 27        |
| CoNiFeS–OH/NF                                                            | 0.33                   | 10                         | 1.46             | This work |

## References

- (1) Huang, C. Q.; Zhong, Y. H.; Chen, J. X.; Li, J.; Zhang, W.; Zhou, J. Q.; Zhang, Y. L.; Yu, L.; Yu, Y. Fe induced nanostructure reorganization and electronic structure modulation over CoNi (oxy)hydroxide nanorod arrays for boosting oxygen evolution reaction. *Chem. Eng. J.* **2021**, *403*, 126304.
- (2) Yang, Y.; Dang, L. N.; Shearer, M. J.; Sheng, H. Y.; Li, W. J.; Chen, J.; Xiao, P.; Zhang, Y. h.; Hamers, R. J.; Jin, S. Highly Active Trimetallic NiFeCr Layered Double Hydroxide Electrocatalysts for Oxygen Evolution Reaction. *Adv. Energy Mater.* **2018**, *8*, 1703189.
- (3) Liu, M.; Kong, L. J.; Wang, X. M.; He, J.; Bu, X. H. Engineering Bimetal

Synergistic Electrocatalysts Based on Metal-Organic Frameworks for Efficient Oxygen Evolution. *Small* **2019**, *15*, 1903410.

(4) Liu, C.; Wang, J.; Wan, J. J.; Cheng, Y.; Huang, R.; Zhang, C. Q.; Hu, W. L.; Wei, G. F.; Yu, C. Z. Amorphous Metal–Organic Framework–Dominated Nanocomposites with Both Compositional and Structural Heterogeneity for Oxygen Evolution. *Angew. Chem., Int. Ed.* **2020**, *59*, 3630–3637.

(5) Hu, Y. M.; Wang, Z. L.; Liu, W. J.; Xu, L.; Guan, M. L.; Huang, Y. P.; Zhao, Y.; Bao, J.; Li, H. M. Novel Cobalt–Iron–Vanadium Layered Double Hydroxide Nanosheet Arrays for Superior Water Oxidation Performance. *ACS Sustainable Chem. Eng.* **2019**, *7*, 16828–16834.

(6) Liu, J. L.; Zheng, Y.; Wang, Z. Y.; Lu, Z. G.; Vasileff, A.; Qiao, S. Z. Free-standing single-crystalline NiFe-hydroxide nanoflake arrays: a self-activated and robust electrocatalyst for oxygen evolution. *Chem. Commun.* **2018**, *54*, 463–466.

(7) Li, X.; Kou, Z. K.; Xi, S. B.; Zang, W. J.; Yang, T.; Zhang, L.; Wang, J. Porous NiCo<sub>2</sub>S<sub>4</sub>/FeOOH nanowire arrays with rich sulfide/hydroxide interfaces enable high OER activity. *Nano Energy* **2020**, *78*, 105230.

(8) Han, X. T.; Niu, Y. Y.; Yu, C.; Liu, Z. B.; Huang, H. W.; Huang, H. L.; Li, S. F.; Guo, W.; Tan, X. Y.; Qiu, J. S. Ultrafast construction of interfacial sites by wet chemical etching to enhance electrocatalytic oxygen evolution. *Nano Energy* **2020**, *69*, 104367.

(9) Jeung, Y.; Roh, H.; Yong, K. Co-anion exchange prepared 2D structure Ni(Co,Fe)PS for efficient overall water electrolysis. *Appl. Surf. Sci.* **2022**, *576*, 151720.

(10) Wei, R.; Zhang, K. S.; Zhao, P. j.; An, Y. P.; Tang, C.; Chen, C.; Li, X. M.; Ma, X. L.; Ma, Y. F.; Hao, X. G. Defect-rich FeCoNiPB/(FeCoNi)<sub>3</sub>O<sub>4-x</sub> high-entropy composite nanoparticles for oxygen evolution reaction: Impact of surface activation. *Appl. Surf. Sci.* **2021**, *549*, 149327.

- (11) Li, F.; Chen, J. X.; Zhang, D. F.; Fu, W. F.; Chen, Y.; Wen, Z. H.; Lv, X. J. Heteroporous MoS<sub>2</sub>/Ni<sub>3</sub>S<sub>2</sub> towards superior electrocatalytic overall urea splitting. *Chem. Commun.* **2018**, *54*, 5181–5184.
- (12) Zhang, J. Y.; He, T.; Wang, M. D.; Qi, R. J.; Yan, Y.; Dong, Z. H.; Liu, H. F.; Wang, H. M.; Xia, B. Y. Energy-saving hydrogen production coupling urea oxidation over a bifunctional nickel-molybdenum nanotube array. *Nano Energy* **2019**, *60*, 894–902.
- (13) Zhu, W. X.; Ren, M. R.; Hu, N.; Zhang, W. T.; Luo, Z. T.; Wang, R.; Wang, J.; Huang, L. J.; Suo, Y. R.; Wang, J. L. Traditional NiCo<sub>2</sub>S<sub>4</sub> Phase with Porous Nanosheets Array Topology on Carbon Cloth: A Flexible, Versatile and Fabulous Electrocatalyst for Overall Water and Urea Electrolysis. *ACS Sustainable Chem. Eng.* **2018**, *6*, 5011–5020.
- (14) Wang, X. X.; Wang, J. M.; Sun, X. P.; Wei, S.; Cui, L.; Yang, W. R.; Liu, J. Q. Hierarchical coral-like NiMoS nanohybrids as highly efficient bifunctional electrocatalysts for overall urea electrolysis. *Nano Res.* **2017**, *11*, 988–996.
- (15) Song, W. J.; Xu, M. Z.; Teng, X.; Niu, Y. L.; Gong, S. Q.; Liu, X.; He, X. M.; Chen, Z. F. Construction of self-supporting, hierarchically structured caterpillar-like NiCo<sub>2</sub>S<sub>4</sub> arrays as an efficient trifunctional electrocatalyst for water and urea electrolysis. *Nanoscale* **2021**, *13*, 1680–1688.
- (16) Yan, X. D.; Hu, Q. T.; Liu, J. Y.; Zhang, W. D.; Gu, Z. G. Ultrafine-grained NiCo layered double hydroxide nanosheets with abundant active edge sites for highly enhanced electro-oxidation of urea. *Electrochim. Acta* **2021**, *368*, 137648.
- (17) Xu, Q. L.; Yu, T. Q.; Chen, J. L.; Qian, G. F.; Song, H. N.; Luo, L.; Chen, Y. L.; Liu, T. Y.; Wang, Y. Z.; Yin, S. B. Coupling Interface Constructions of FeNi<sub>3</sub>-MoO<sub>2</sub> Heterostructures for Efficient Urea Oxidation and Hydrogen Evolution Reaction. *ACS Appl. Mater. Interfaces* **2021**, *13*, 16355–16363.
- (18) Wang, J. M.; Zhao, Z.; Shen, C.; Liu, H. P.; Pang, X. Y.; Gao, M. Q.; Mu, J.;

Cao, F.; Li, G. Q. Ni/NiO heterostructures encapsulated in oxygen-doped graphene as multifunctional electrocatalysts for the HER, UOR and HMF oxidation reaction.

*Catal. Sci. Technol.* **2021**, *11*, 2480–2490.

(19) Li, R. Q.; Liu, Q.; Zhou, Y. N.; Lu, M. J.; Hou, J. L.; Qu, K. G.; Zhu, Y. C.; Fontaine, O. 3D self-supported porous vanadium-doped nickel nitride nanosheet arrays as efficient bifunctional electrocatalysts for urea electrolysis. *J. Mater. Chem. A* **2021**, *9*, 4159–4166.

(20) Zheng, Y.; Tang, P. H.; Xu, X. X.; Sang, X. G. POM derived UOR and HER bifunctional NiS/MoS<sub>2</sub> composite for overall water splitting. *J. Solid State Chem.* **2020**, *292*, 121644.

(21) Babar, P.; Lokhande, A.; Karade, V.; Pawar, B.; Gang, M. G.; Pawar, S.; Kim, J. H. Bifunctional 2D Electrocatalysts of Transition Metal Hydroxide Nanosheet Arrays for Water Splitting and Urea Electrolysis. *ACS Sustainable Chem. Eng.* **2019**, *7*, 10035–10043.

(22) Zhao, Q. Q.; Meng, C.; Kong, D. Q.; Wang, Y. M.; Hu, H.; Chen, X. M.; Han, Y.; Chen, X. D.; Zhou, Y.; Lin, M. C.; Wu, M. B. In Situ Construction of Nickel Sulfide Nano-Heterostructures for Highly Efficient Overall Urea Electrolysis. *ACS Sustainable Chem. Eng.* **2021**, *9*, 15582–15590.

(23) Zhang, J.; Huang, S. S.; Ning, P.; Xin, P. J.; Chen, Z. W.; Wang, Q.; Uvdal, K.; Hu, Z. J. Nested hollow architectures of nitrogen-doped carbon-decorated Fe, Co, Ni-based phosphides for boosting water and urea electrolysis. *Nano Res.* **2021**, *15*, 1916–1925.

(24) Hao, P.; Zhu, W. Q.; Li, L. Y.; Tian, J.; Xie, J. F.; Lei, F. C.; Cui, G. W.; Zhang, Y. Q.; Tang, B. Nickel incorporated Co<sub>9</sub>S<sub>8</sub> nanosheet arrays on carbon cloth boosting overall urea electrolysis. *Electrochim. Acta* **2020**, *338*, 135883.

(25) Yang, Z. X.; Zhang, Y. Q.; Feng, C. Q.; Wu, H. M.; Ding, Y.; Mei, H. P. doped NiCoZn LDH growth on nickel foam as an highly efficient bifunctional

electrocatalyst for Overall Urea-Water Electrolysis. *Int. J. Hydrogen Energy* **2021**, *46*, 25321–25331.

(26) Zhang, Y. X.; Qiu, Y. F.; Wang, Y. P.; Li, B.; Zhang, Y. Y.; Ma, Z.; Liu, S. Q. Coaxial Ni-S@N-Doped Carbon Nanofibers Derived Hierarchical Electrodes for Efficient H<sub>2</sub> Production via Urea Electrolysis. *ACS Appl. Mater. Interfaces* **2021**, *13*, 3937–3948.

(27) Liu, C.; Li, F.; Xue, S.; Lin, H. L.; Sun, Y.; Cao, J.; Chen, S. F. Fe Doped Ni<sub>3</sub>S<sub>2</sub> Nanosheet Arrays for Efficient and Stable Electrocatalytic Overall Urea Splitting. *ACS Appl. Energy Mater.* **2022**, *5*, 1183–1192.
